# Supplementary material for: The synthesis, spectroscopic characterization, DFT/TD-DFT/PCM calculations of the molecular structure and NBO of the novel charge-transfer complexes of pyrazine Schiff base derivatives with aromatic nitro compounds
Source: Royal Society of Chemistry journal article supplement (doi:10.1039/d0nj05397j), 2020-12-08
Supplement: d0nj05397j1.pdf [file d0nj05397j1.pdf]

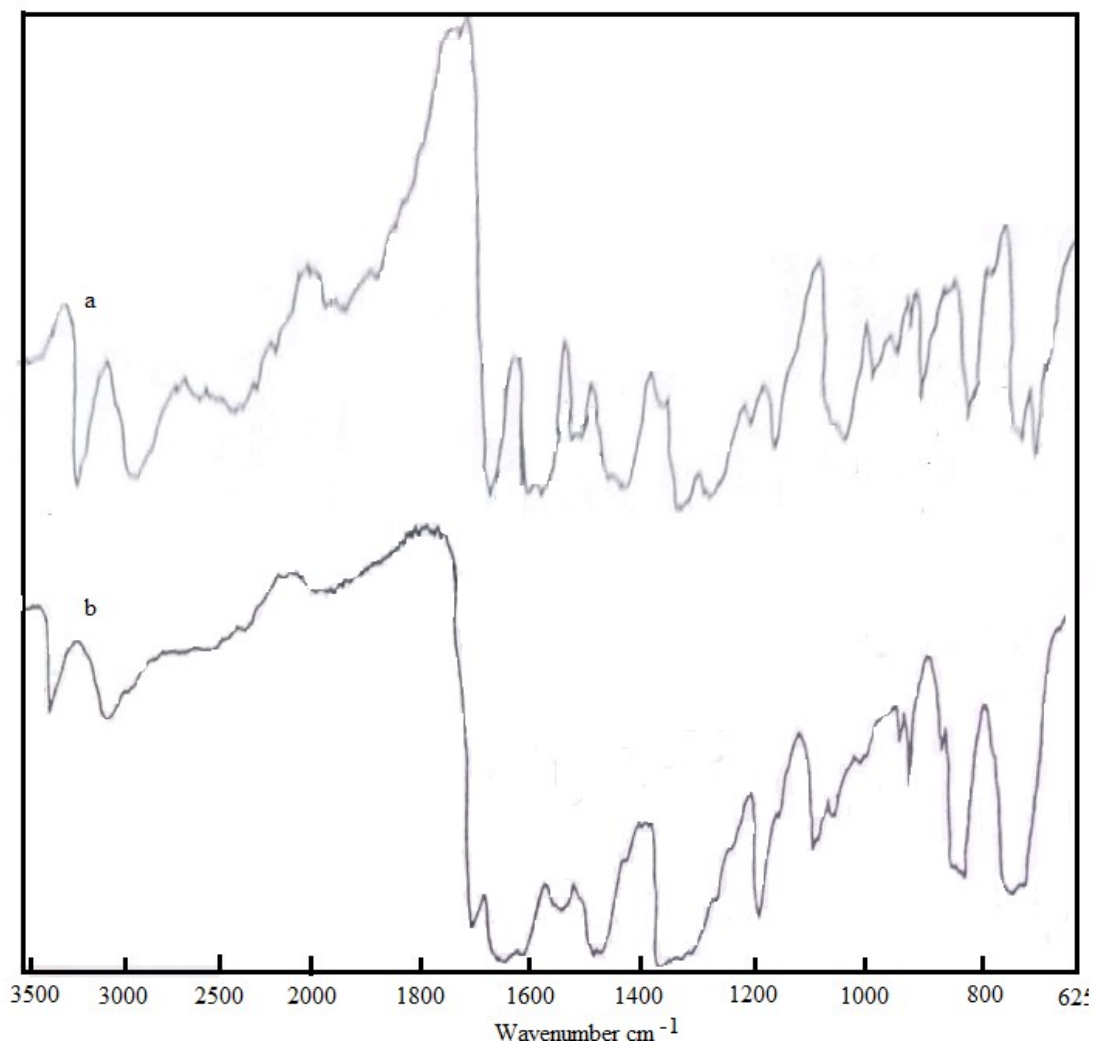

**Fig. S1.** FTIR spectra of charge transfer complexes of 2-aminopyrazine Schiff bases with 3,5-dinitrosalicylic acid

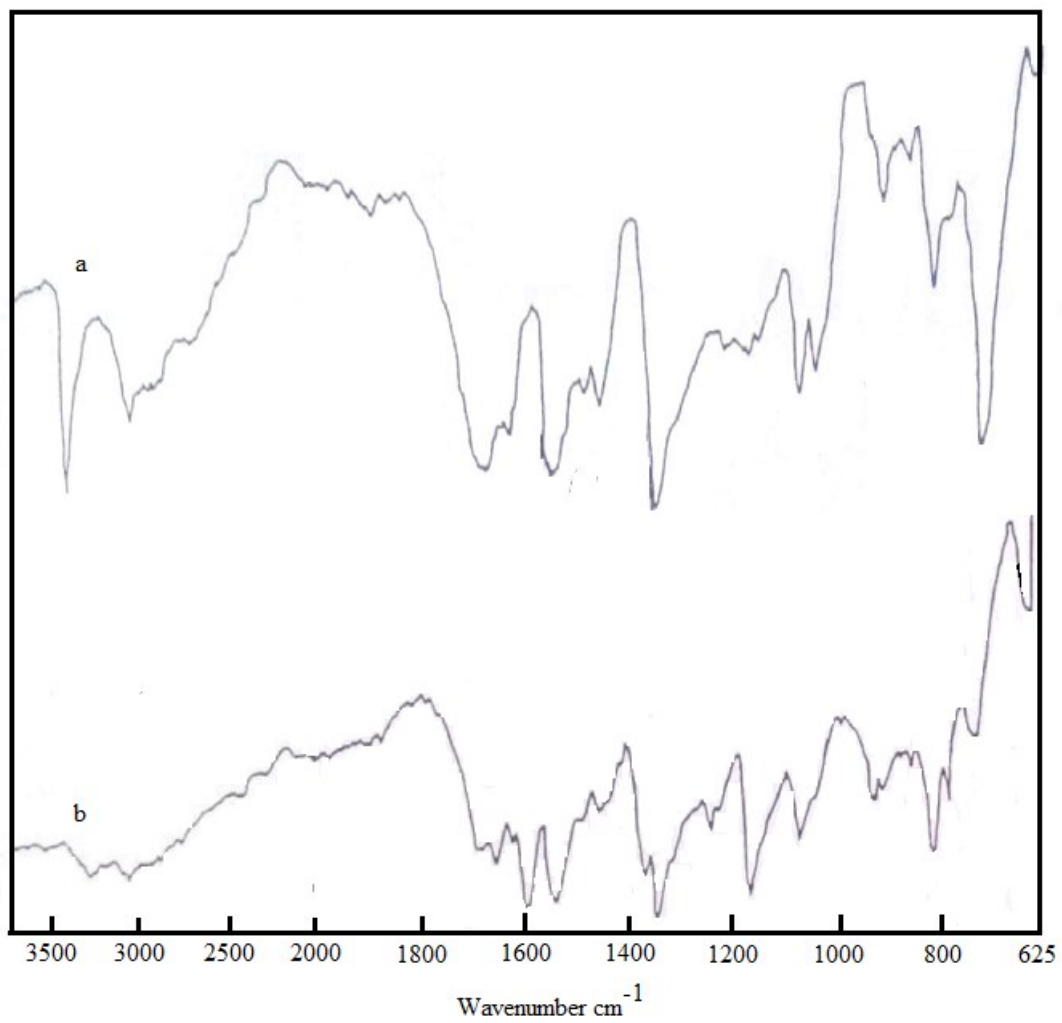

**Fig. S2.** FTIR spectra of charge transfer complexes of 2-aminopyrazine Schiff bases with 3,5-dinitrobenzoic acid

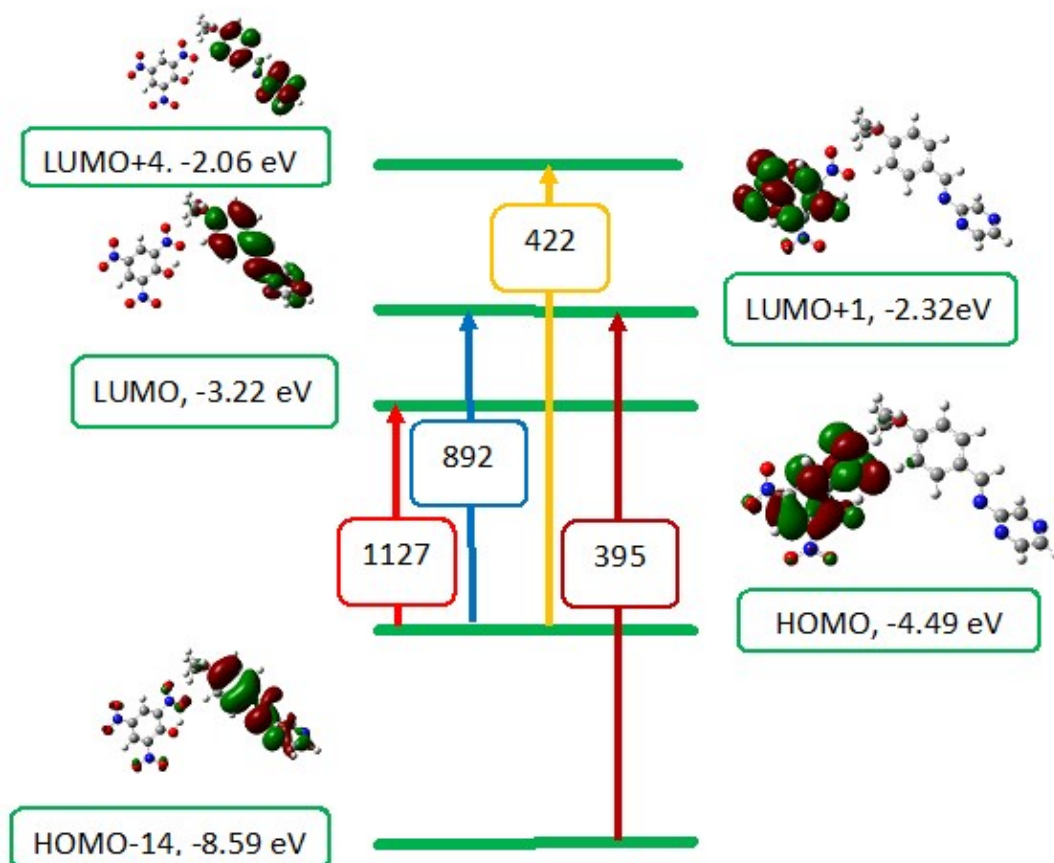

**Fig. S3.** Frontier molecular orbitals involved in the electronic absorption transitions of NDMABPA  $\rightarrow$  PA calculated at TD-B3LYP/6-31G(d,p) level of theory.

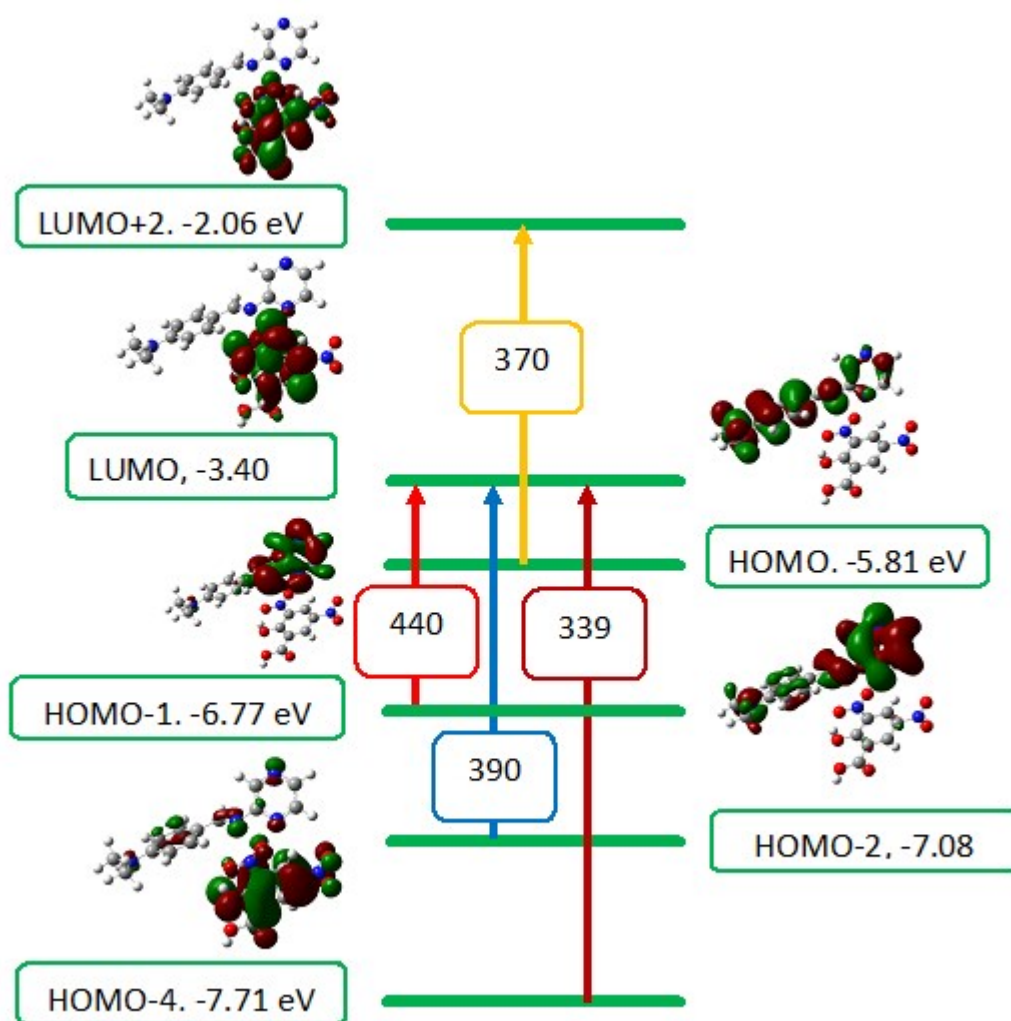

**Fig. S4.** Frontier molecular orbitals involved in the electronic absorption transitions of NDMABPA  $\rightarrow$  3,5-DNSA calculated at TD-B3LYP/6-31G(d,p) level of theory.

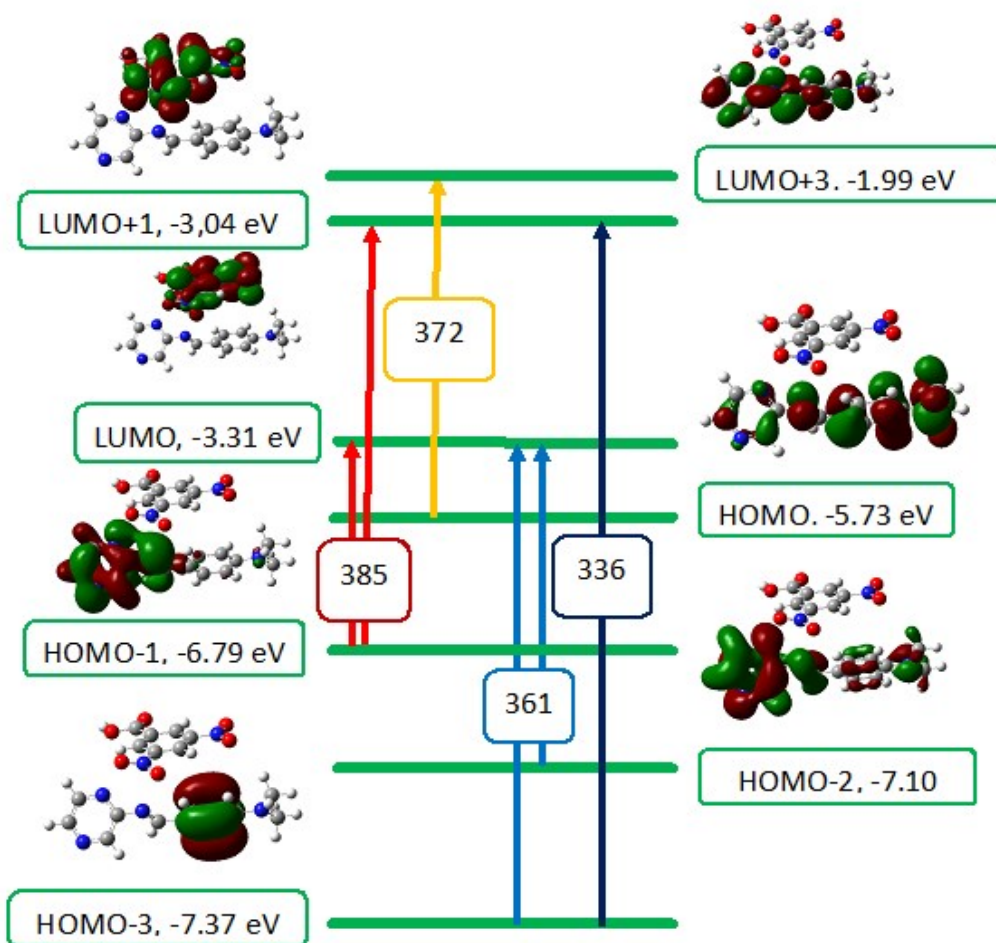

**Fig. S5.** Frontier molecular orbitals involved in the electronic absorption transitions of NDMABPA  $\rightarrow$  3,5-DNBA calculated at TD-B3LYP/6-31G(d,p) level of theory.
