# Supplementary material for: The synthesis, spectroscopic characterization, DFT/TD-DFT/PCM calculations of the molecular structure and NBO of the novel charge-transfer complexes of pyrazine Schiff base derivatives with aromatic nitro compounds
Source: Royal Society of Chemistry journal article supplement (doi:10.1039/d0nj05397j), 2020-12-08
Supplement: d0nj05397j2.pdf [file d0nj05397j2.pdf]

**Table S1** Selected geometric bond lengths, bond angles and dihedral angles of the optimized p-N-dimethyl-2-aminopyrazine Schiff base (donor), Picric, 3,5-dinitrosalicylic and 3,5-dinitrobenzoic acids (acceptors) and their CT complex using B3LYP/6-311G(d,p)

| Ligand/<br>complexes | Bond lengths (Å) |        | Bond angles |         | Dihedral angles |          |
|----------------------|------------------|--------|-------------|---------|-----------------|----------|
| Donor                | C5-C6            | 1.409  | N1-C5-C6    | 122.643 | C5-C6- N7-C8    | 180.000  |
|                      | C6-N4            | 1.341  | C5-C6-N4    | 120.354 | C6- N7-C8-C9    | 180.000  |
|                      | C6-N7            | 1.396  | C5-C6-N7    | 117.261 | N7-C8-C9-C10    | 0.000    |
|                      | C8-N7            | 1.288  | N4-C6-N7    | 122.385 | N7-C8-C9-C14    | 180.000  |
|                      | C8-C9            | 1.448  | C6-N7-C8    | 119.115 | N4-C6-N7-C8     | 0.000    |
|                      | C9-C10           | 1.406  | N7-C8-C9    | 122.656 |                 |          |
|                      | C9-C14           | 1.402  | C8-C9-C10   | 122.488 |                 |          |
|                      |                  |        | C8-C9-C14   | 120.475 |                 |          |
| Acceptor (PA)        | C1-C2            | 1.428  | O9-C1-C2    | 122.861 | O9-C1-C2-C5     | 180.000  |
|                      | C3-N11           | 1.387  | C1-C2-N13   | 120.403 | C1-C2-N13-O18   | 0.000    |
|                      | C2-N13           | 1.467  | C2-N13-O18  | 117.728 | C1-C2-N13-O19   | 180.000  |
|                      | N13-O18          | 1.244  | C2-N13-O19  | 118.825 | O9-C1-C3-N11    | 0.000    |
|                      | N13-O19          | 1.212  | N13-C2-C5   | 30.603  | C1-C3-C4-C6     | 0.000    |
| CT complex           |                  |        | O9-C1-C3    | 121.521 | N7-C8-C9-C10    | -0.418   |
|                      | C8-N7            | 1.272  | N4-C6-N7    | 116.574 | N5-C6-N7-C8     | 134.297  |
|                      | C6-N7            | 1.381  | C5-C6-N7    | 29.047  | C6-N7-C8-C9     | 176.716  |
|                      | C6-N5            | 1.336  | C6-N7-C8    | 120.238 | N1-C4-C6-N7     | -178.565 |
|                      | C6-C4            | 1.407  | N7-C8-C9    | 31.414  | N5-C6-N7-N42    | -52.660  |
|                      | C33-N44          | 1.473  | C6-N7-N42   | 160.509 | N42-C34-C32-O40 | -1.282   |
|                      | C34-C32          | 1.439  | C33-N44-O49 | 118.411 | N42-C34-C35-C37 | 178.957  |
|                      | C34-O35          | 1.3968 | C33-N44-O50 | 116.752 |                 |          |
| C35-C37              | 1.390            |        |             |         |                 |          |
| Acceptor             |                  |        |             |         |                 |          |

3,5-dinitro  
salicylic acid

|         |       |            |         |               |          |
|---------|-------|------------|---------|---------------|----------|
| C2-C5   | 1.417 | C2-C5-C6   | 121.715 | C1-C2-C5-N15  | -179.987 |
| C5-C6   | 1.389 | C2-C5-N15  | 120.693 | C2-C5-N15-O17 | 0.011    |
| C5-N15  | 1.464 | C5-C2-O13  | 122.269 | C2-C5-N15-O18 | -179.980 |
| C2-O13  | 1.337 | C5-N15-O17 | 117.593 | O13-C2-C5-N15 | 0.023    |
| N15-O17 | 1.247 | C5-N15-O18 | 119.091 | C6-C5-N15-O17 | 179.983  |
| N15-O18 | 1.211 |            |         | C6-C5-N15-O18 | 0.026    |

CT complex

|         |       |             |         |                  |          |
|---------|-------|-------------|---------|------------------|----------|
| C6-N7   | 1.393 | N4-C6-N7    | 117.375 | C3-N4-C6-N7      | -179.487 |
| N7-C8   | 1.285 | C6-N7-C8    | 119.087 | N4-C6-N7-C8      | -136.956 |
| C8-C9   | 1.451 | C5-C6-N4    | 120.291 | C6-N7-C8-C9      | -174.021 |
| C6-N4   | 1.340 | C5-C6-N7    | 122.253 | N4-C6-N7-N38     | -12.355  |
| C5-C6   | 1.412 | N7-C8-C9    | 124.117 | C9-C8-N7-N38     | 105.256  |
| C9-C10  | 1.403 | C8-C9-C10   | 119.893 | C8-N7-N38-O39    | 11.362   |
| C9-C14  | 1.406 | C8-C9-C14   | 122.431 | C8-N7-N38O40     | 146.777  |
| N7-N38  | 5.62  | C8-N7-N38   | 130.984 | C25-C26-N38-O39  | -0.975   |
| N38-O39 | 1.222 | C6-N7-N38   | 64.837  | C25-C26-N38-O40  | 179.103  |
| N38-O40 | 1.226 | O39-N38-O40 | 124.933 | O34- C25-C28-N38 | 0.568    |
| C26-N38 | 1.471 | C26-N38-O39 | 117.568 | C23-C25-C26-N38  | -178.988 |
| C26-C28 | 1.381 | C26-N38-O40 | 117.500 | C27-C28-C26-N38  | 179.379  |
| C28-C27 | 1.386 | C25-C26-N38 | 119.556 | C25-C23-C29-O30  | -1.620   |
| C27-O35 | 1.459 | C28-C26-N38 | 119.123 |                  |          |
|         |       | C25-C26-C28 | 121.314 |                  |          |

Acceptor  
3,5-dinitro

## benzoic acid

|         |        |            |         |               |         |
|---------|--------|------------|---------|---------------|---------|
| C3-C5   | 1.389  | C3-C5-C6   | 122.546 | C1-C3-C5-N14  | 180.000 |
| C5-C6   | 1.387  | C3-C5-N14  | 118.873 | C4-C6-C5-N14  | 180.000 |
| C5-N14  | 1.486  | C5-C6-N14  | 118.581 | C3-C5-N15-O16 | 0.000   |
| N14-O16 | 1.221  | C5-N14-O16 | 117.168 | C3-C5-N15-O17 | 180.000 |
| N14-O17 | 1.2205 | C5-N14-O16 | 117.229 |               |         |

## CT complex

|         |       |             |         |                 |          |
|---------|-------|-------------|---------|-----------------|----------|
| C3-N4   | 1.333 | N4-C6-N7    | 117.061 | C3-N4-C6-N7     | -178.713 |
| N4-C6   | 1.341 | C6-N7-C8    | 119.790 | N4-C6-N7-C8     | -134.315 |
| C5-C6   | 1.412 | C5-C6-N4    | 120.421 | C6-N7-C8-C9     | -176.598 |
| C6-N7   | 1.391 | C5-C6-N7    | 122.438 | N4-C6-N7-N33    | 37.075   |
| N7-C8   | 1.285 | C8-C9-C10   | 120.154 | C8-N7-N33O35    | -62.696  |
| C8-C9   | 1.450 | C8-C9-C14   | 122.160 | C8-N7-N34O36    | 170.316  |
| C9-C10  | 1.403 | C6-N7-N33   | 102.868 | C24-C26-N33-O35 | 163.743  |
| C9-C14  | 1.407 | C8-N7-N33   | 136.542 | C24-C26-N33-O36 | -16.979  |
| N7-N33  | 3.558 | O35-N33-O36 | 125.504 | C28-C26-N33-O35 | -15.454  |
| N33-O35 | 1.224 | C26-N33-O35 | 117.085 | C28-C26-N33-O36 | 163.825  |
| N33-O36 | 1.218 | C26-N33-O36 | 117.407 | C23-C24-C26-N33 | -179.562 |
| C26-N33 | 1.491 | C25-C27-C28 | 122.228 | C27-C28-C24-N33 | 179.047  |
| C26-C24 | 1.388 |             |         |                 |          |
| C26-C28 | 1.385 |             |         |                 |          |

---

**Table S2** Total energy, energy of HOMO and LUMO, energy gap ( $E_g$ , eV), ionization energy (I, eV), electron affinity (A, eV), absolute electronegativities, ( $\chi$ , eV), absolute hardness ( $\eta$ , eV), global softness (S,  $\text{eV}^{-1}$ ) chemical potential ( $\pi$ ,  $\text{eV}^{-1}$ ) global electrophilicity ( $\omega$ , eV), additional electronic charge,  $\Delta N_{\text{max}}$ , of the studied p-N-dimethyl-2-aminopyrazine Schiff base (donor, Picric, 3,5-dinitrosalicylic and 3,5-dinitrobenzoic acids (acceptors) and their CT complex using B3LYP/6-311G(d,p)

| Parameter                | Donor                              | Acceptor | CT complex | Acceptor | CT complex | Acceptor | CT complex |
|--------------------------|------------------------------------|----------|------------|----------|------------|----------|------------|
|                          | p-N(CH <sub>3</sub> ) <sub>2</sub> | PA       |            | 3,5-dNSA |            | 3,5-DNBA |            |
| $E_T$ , a.u.             | -722.97                            | -921.20  | -1664.20   | -904.97  | -1627.90   | -829.85  | -1552.68   |
| $E_{\text{HOMO}}$ , a.u. | -0.1988                            | -0.3117  | -0.1652    | -0.3129  | -0.2135    | -0.3280  | -0.2107    |
| $E_{\text{LUMO}}$ , a.u. | -0.0694                            | -0.1506  | -0.1182    | -0.1610  | -0.1249    | -0.1352  | -0.1217    |
| $E_g$ , eV               | 3.5228                             | 4.3832   | 1.2800     | 4.1334   | 2.4129     | 5.2464   | 2.4226     |
| I, eV                    | 5.4099                             | 8.4824   | 4.4964     | 8.5145   | 5.8108     | 8.9265   | 5.7343     |
| A, eV                    | 1.8871                             | 4.0992   | 3.2164     | 4.3811   | 3.3979     | 3.6801   | 3.3117     |
| $\chi$ , eV              | 3.6485                             | 6.2908   | 3.8564     | 6.4478   | 4.6043     | 6.3033   | 4.5230     |
| $\eta$ , eV              | 1.7614                             | 2.1916   | 0.6400     | 2.0667   | 1.2064     | 2.6232   | 1.2113     |
| S, eV                    | 0.2839                             | 0.2281   | 0.7812     | 0.2419   | 0.4144     | 0.1906   | 0.4128     |
| $\pi$ eV                 | -3.6485                            | -6.2908  | -3.8564    | -6.4478  | -4.6043    | -6.3033  | -4.5230    |
| ( $\omega$ , eV)         | 4.1238                             | 9.1353   | 11.6186    | 10.0566  | 8.7857     | 12.2387  | 8.4326     |
| $\Delta N_{\text{max}}$  | 2.0714                             | 2.8704   | 6.0256     | 3.1198   | 3.8166     | 2.4029   | 3.7340     |

**Table S3** NBO charges calculated for the of the studied p-N-dimethyl-2-aminopyrazine Schiff base donor, Picric, 3,5-dinitrosalicylic and 3,5-dinitrobenzoic acids (acceptors) and their CT complex using B3LYP/6-311G(d,p)

| Parameter | Donor                              | Acceptor | CT complex | Acceptor | CT complex | Acceptor | CT complex |
|-----------|------------------------------------|----------|------------|----------|------------|----------|------------|
|           | p-N(CH <sub>3</sub> ) <sub>2</sub> | PA       |            | 3,5-dNSA |            | 3,5-DNBA |            |
| N1        | -0.419                             |          | -0.407     |          | -0.410     |          | -0.41      |
| N4        | -0.472                             |          | -0.411     |          | -0.452     |          | -0.445     |
| N7        | -0.527                             |          | -0.408     |          | -0.483     |          | -0.485     |
| N23       | -0.426                             |          |            |          |            |          |            |
| N42       |                                    | 0.515    | 0.344      |          |            |          |            |
| N43       |                                    | 0.518    | 0.500      |          |            |          |            |
| N44       |                                    | 0.521    | 0.500      |          |            |          |            |
| N35       |                                    |          |            | 0.476    | 0.520      |          |            |
| N38       |                                    |          |            | 0.472    | 0.504      |          |            |
| N33       |                                    |          |            |          |            | 0.502    | 0.507      |
| N34       |                                    |          |            |          |            | 0.502    | 0.507      |

**Table S4** Calculated natural charge, natural population and natural electronic configuration of the studied p-N-dimethyl-2-aminopyrazine Schiff base donor, Picric, 3,5-dinitrosalicylic and 3,5-dinitrobenzoic acids (acceptors) and their CT complex using B3LYP/6-31G+(d,p)

| Complex             | Natural charge | Core   | Natural population |         |         | Natural electronic configuration                                                                     |
|---------------------|----------------|--------|--------------------|---------|---------|------------------------------------------------------------------------------------------------------|
|                     |                |        | Valence            | Rydberg | Total   |                                                                                                      |
| Donor (f), (N7)     | -0.527         | 1.9993 | 5.5092             | 0.0186  | 7.5271  | [core]2s <sup>1.37</sup> 2p <sup>4.14</sup> 3p <sup>0.01</sup> 3d <sup>0.01</sup>                    |
| PA (1), (N13)       | 0.521          | 1.9994 | 4.4286             | 0.0513  | 6.4792  | [core]2s <sup>1.07</sup> 2p <sup>3.36</sup> 3s <sup>0.01</sup> 3p <sup>0.03</sup> 3d <sup>0.02</sup> |
| CT complex (N7)     | -0.438         | 1.9993 | 5.4554             | 0.0285  | 7.4832  | [core]2s <sup>1.35</sup> 2p <sup>4.10</sup> 3p <sup>0.01</sup> 3d <sup>0.01</sup>                    |
| (N35)               | 0.520          | 1.9995 | 4.4326             | 0.0480  | 6.4801  | [core]2s <sup>1.10</sup> 2p <sup>3.34</sup> 3s <sup>0.01</sup> 3d <sup>0.01</sup> 4p <sup>0.03</sup> |
| 3,5-DNSA (2), (N15) | 0.476          | 1.9994 | 4.4898             | 0.0350  | 6.5242  | [core]2s <sup>1.08</sup> 2p <sup>3.41</sup> 3s <sup>0.01</sup> 3p <sup>0.03</sup>                    |
| CT complex, (N7)    | -0.483         | 1.9993 | 5.4554             | 0.0285  | 7.4832  | [core]2s <sup>1.35</sup> 2p <sup>4.10</sup> 3p <sup>0.01</sup> 3d <sup>0.01</sup>                    |
| (N35)               | 0.520          | 1.9995 | 4.4326             | 0.0480  | 6.4801  | [core]2s <sup>1.10</sup> 2p <sup>3.34</sup> 3s <sup>0.01</sup> 3d <sup>0.01</sup> 4p <sup>0.03</sup> |
| 3,5-DNBA (3), (N14) | 0.502          | 1.9996 | 4.4426             | 0.0563  | 6.4985  | [core]2s <sup>1.10</sup> 2p <sup>3.35</sup> 3d <sup>0.02</sup> 4p <sup>0.03</sup>                    |
| CT complex (N7)     | -0.485         | 1.9993 | 5.4576             | 0.02858 | 7.4854  | [core]2s <sup>1.35</sup> 2p <sup>4.11</sup> 3p <sup>0.01</sup> 3d <sup>0.01</sup>                    |
| (N33)               | 0.507          | 1.9996 | 4.4374             | 0.0557  | 6.49263 | [core]2s <sup>1.09</sup> 2p <sup>3.34</sup> 3s <sup>0.01</sup> 3d <sup>0.02</sup> 4p <sup>0.03</sup> |

**Table S5** Calculated total static dipole moment ( $\mu$ ), the mean polarizability  $\langle\alpha\rangle$ , anisotropy of the polarizability  $\Delta\alpha$  and the first-order hyperpolarizability  $\langle\beta\rangle$  configuration for the studied p-N-dimethyl-2-aminopyrazine Schiff base donor, Picric, 3,5-dinitrosalicylic and 3,5-dinitrobenzoic acids (acceptors) and their CT complex using B3LYP/6-311G(d,p)

| Property                    | Donor                    | Acceptor                               | CT complex                | Acceptor                  | CT complex               | Acceptor                  | CT complex                |                           |
|-----------------------------|--------------------------|----------------------------------------|---------------------------|---------------------------|--------------------------|---------------------------|---------------------------|---------------------------|
|                             | Urea                     | p-N(CH <sub>3</sub> ) <sub>2</sub> (f) | PA (1)                    | 3,5-dNSA (2)              |                          | 3,5-DNBA (3)              |                           |                           |
| $\mu$ , D                   | 1.3197                   | 6.1717                                 | 1.8975                    | 20.8480                   | 3.9698                   | 9.6823                    | 3.7529                    | 2.7038                    |
| $\alpha_{xx}$ , a.u.        | -                        | -79.5137                               | -106.1316                 | -243.751                  | -105.9304                | -167.1929                 | -108.0481                 | -159.0539                 |
| $\alpha_{yy}$               | -                        | -92.2189                               | -108.2568                 | -168.8421                 | -118.8258                | -198.766                  | -87.0213                  | -191.8124                 |
| $\alpha_{zz}$               | -                        | -104.1396                              | -84.3036                  | -195.6793                 | -86.5795                 | -196.6617                 | -81.495                   | -196.5906                 |
| $\alpha_{xy}$               | -                        | -11.4706                               | 3.4958                    | -4.8814                   | 4.9395                   | 9.3347                    | -7.5274                   | -25.1649                  |
| $\alpha_{xz}$               | -                        | 0                                      | -0.0036                   | 16.0001                   | 0.0039                   | 10.8413                   | 0                         | 9.766                     |
| $\alpha_{yz}$               | -                        | 0                                      | 0.0006                    | -19.1557                  | -0.0048                  | -10.5663                  | 0                         | 9.0787                    |
| $\langle\alpha\rangle$ esu  | -                        | -1.3628x10 <sup>-23</sup>              | -1.4755x10 <sup>-23</sup> | -3.0049x10 <sup>-23</sup> | -1.538x10 <sup>-23</sup> | -2.7794x10 <sup>-23</sup> | -1.3662x10 <sup>-23</sup> | -2.7044x10 <sup>-23</sup> |
| $\Delta\alpha$ , esu        | -                        | 3.1611x10 <sup>-24</sup>               | 3.4033x10 <sup>-24</sup>  | 9.7421x10 <sup>-24</sup>  | 4.1662x10 <sup>-24</sup> | 4.5313x10 <sup>-24</sup>  | 3.5963x10 <sup>-24</sup>  | 5.2449x10 <sup>-24</sup>  |
| $\beta_{xxx}$               | -                        | -19.8405                               | -58.2773                  | 575.3357                  | 71.581                   | -425.5192                 | -2.765                    | 79.9354                   |
| $\beta_{xxy}$               | -                        | 12.8082                                | -0.7731                   | 43.673                    | 25.9008                  | -12.5359                  | 35.5277                   | -0.6102                   |
| $\beta_{xyy}$               | -                        | -45.6068                               | 20.0168                   | 178.3933                  | -30.791                  | -36.5143                  | -36.5708                  | 11.3865                   |
| $\beta_{yyy}$               | -                        | 178.6939                               | -14.9933                  | 261.2411                  | 38.4414                  | -138.2668                 | 69.4985                   | 65.0427                   |
| $\beta_{xxz}$               | -                        | 0                                      | -0.0089                   | -36.4279                  | 0.024                    | 26.1764                   | 0                         | -56.0454                  |
| $\beta_{xyz}$               | -                        | 0                                      | -0.0004                   | 15.4904                   | -0.0007                  | -18.3411                  | 0                         | 34.8468                   |
| $\beta_{yyz}$               | -                        | 0                                      | 0.0041                    | 36.2127                   | 0.0334                   | 21.2741                   | 0                         | 12.1622                   |
| $\beta_{xzz}$               | -                        | -1.5918                                | -1.8796                   | 20.9318                   | -0.7307                  | -33.484                   | 0.1683                    | 22.1173                   |
| $\beta_{yzz}$               | -                        | -0.1705                                | 0.1695                    | 29.6825                   | 3.2008                   | -9.0052                   | -3.0908                   | -12.0357                  |
| $\beta_{zzz}$               | -                        | 0                                      | -0.0012                   | -24.7883                  | -0.0087                  | -5.6371                   | 0                         | -23.6182                  |
| $\langle\beta\rangle$ , esu | 0.1947x10 <sup>-30</sup> | 1.7515x10 <sup>-30</sup>               | 0.3720x10 <sup>-30</sup>  | 7.2933x10 <sup>-30</sup>  | 0.6784x10 <sup>-30</sup> | 4.5125x10 <sup>-30</sup>  | 0.9434x10 <sup>-30</sup>  | 1.2270x10 <sup>-30</sup>  |
